# Supplementary material for: Occurrence of Biogenic Amines in Wines from the Central European Region (Zone B) and Evaluation of Their Safety
Source: MDPI journal article supplement (doi:10.3390/foods12091835), 2023-04-28
Supplement: s1 [file s1]

**Table S1.** Biogenic amines content (mg/L)<sup>a</sup> in white wines from the Central European region.

| Number | Wine                               | Biogenic amines content ** |           |           |          |          |          |            |
|--------|------------------------------------|----------------------------|-----------|-----------|----------|----------|----------|------------|
|        |                                    | HIS                        | TYM       | PUT       | CAD      | PEA      | SPD      | SPN        |
| 1      | Aurelius                           | ND *                       | 2.4a±0.1  | ND        | ND       | ND       | ND       | 5.4b±0.3   |
| 2      | Děvín                              | ND                         | 4.1a±0.2  | ND        | ND       | ND       | ND       | 12.9b±0.6  |
| 3      | Hibernal                           | ND                         | 1.9a±0.1  | ND        | ND       | ND       | ND       | 5.1b±0.2   |
| 4      | Chardonnay                         | ND                         | 6.7a±0.3  | 7.4a±0.4  | ND       | ND       | ND       | 6.8a±0.3   |
| 5      | Chardonnay                         | ND                         | 3.3a±0.2  | ND        | ND       | ND       | ND       | 7.9b±0.4   |
| 6      | Chardonnay                         | 0.7a±0.0                   | 2.8b±0.2  | ND        | ND       | ND       | ND       | 6.8c±0.3   |
| 7      | Chardonnay                         | ND                         | 1.7a±0.1  | ND        | ND       | ND       | ND       | 5.1b±0.3   |
| 8      | Chardonnay                         | ND                         | 2.5a±0.1  | 5.7b±0.2  | 0.4c±0.1 | ND       | 0.1d±0.1 | 3.8e±0.1   |
| 9      | Chardonnay                         | ND                         | 5.5a±0.2  | 3.9b±0.2  | ND       | 0.7c±0.1 | ND       | 4.4d±0.2   |
| 10     | Chardonnay                         | ND                         | 1.8a±0.1  | 1.3b±0.1  | ND       | 0.5c±0.1 | ND       | 2.8d±0.1   |
| 11     | Chardonnay                         | ND                         | 16.4a±0.8 | 0.9b±0.1  | 0.4c±0.1 | 0.2c±0.1 | ND       | 0.9b±0.1   |
| 12     | Chardonnay                         | ND                         | 3.5a±0.2  | ND        | ND       | ND       | ND       | 3.3a±0.1   |
| 13     | Chardonnay                         | ND                         | 0.7a±0.1  | ND        | ND       | ND       | ND       | 3.5b±0.1   |
| 14     | Chardonnay                         | ND                         | 0.2a±0.1  | ND        | ND       | ND       | ND       | 3.5b±0.1   |
| 15     | Chardonnay                         | ND                         | 0.2a±0.1  | ND        | ND       | ND       | ND       | 2.5b±0.1   |
| 16     | Chardonnay                         | ND                         | 0.1a±0.1  | ND        | ND       | ND       | ND       | 1.5b±0.1   |
| 17     | Chardonnay                         | ND                         | 0.5a±0.1  | ND        | ND       | 5.1b±0.2 | ND       | 5.3b±0.3   |
| 18     | Irssai Olivér                      | ND                         | 8.2a±0.3  | 10.1b±0.4 | ND       | ND       | ND       | 5.4c±0.3   |
| 19     | Johanniter                         | ND                         | 1.8a±0.1  | ND        | ND       | ND       | ND       | 5.6b±0.3   |
| 20     | Neuburg and Veltliner Green        | ND                         | 3.2a±0.2  | ND        | 1.0b±0.1 | ND       | ND       | 5.3c ± 0.2 |
| 21     | Pinot Blanc and Chardonnay         | 1.0a±0.1                   | 22.8b±1.2 | ND        | ND       | 1.4c±0.1 | ND       | 4.3d±0.2   |
| 22     | Sauvignon Blanc and Traminer       | ND                         | 2.0a±0.1  | ND        | 0.7b±0.1 | ND       | ND       | 4.6c±0.2   |
| 23     | Veltliner Red and Riesling Italico | ND                         | 3.7a±0.2  | ND        | ND       | ND       | ND       | 7.4b±0.3   |

|    |                                     |          |           |           |          |          |          |            |
|----|-------------------------------------|----------|-----------|-----------|----------|----------|----------|------------|
| 24 | Moravian Muscat and Veltliner Green | ND       | 2.4a±0.1  | 30.4b±1.5 | ND       | ND       | ND       | ND         |
| 25 | Moravian Muscat and Veltliner Green | ND       | ND        | ND        | ND       | ND       | ND       | 7.3a±0.3   |
| 26 | Moravian Muscat                     | ND       | ND        | ND        | ND       | ND       | ND       | 2.4a±0.1   |
| 27 | Moravian Muscat                     | ND       | 2.1a±0.1  | ND        | ND       | ND       | ND       | 3.4b±0.1   |
| 28 | Moravian Muscat                     | ND       | 4.1a±0.2  | ND        | ND       | ND       | ND       | ND         |
| 29 | Moravian Muscat                     | ND       | 2.4a±0.1  | ND        | ND       | ND       | ND       | 5.9b±0.3   |
| 30 | Moravian Muscat                     | ND       | 2.9a±0.1  | ND        | ND       | ND       | ND       | 11.0b±0.4  |
| 31 | Muller Thurgau                      | ND       | 1.8a±0.1  | ND        | ND       | ND       | ND       | 8.1b±0.4   |
| 32 | Muller Thurgau                      | ND       | 3.7a±0.2  | 6.1b±0.3  | ND       | ND       | ND       | 5.4c±0.2   |
| 33 | Muller Thurgau                      | ND       | 1.3a±0.1  | 1.7b±0.1  | ND       | ND       | 1.3a±0.1 | 3.9c±0.2   |
| 34 | Muller Thurgau                      | ND       | 3.9a±0.2  | ND        | ND       | ND       | ND       | 8.4b±0.4   |
| 35 | Muller Thurgau                      | ND       | 2.4a±0.1  | ND        | ND       | ND       | ND       | 5.8b±0.3   |
| 36 | Muller Thurgau                      | ND       | 1.6a±0.1  | ND        | 1.3b±0.1 | ND       | ND       | 5.5c±0.3   |
| 37 | Muller Thurgau                      | 1.8a±0.1 | 7.0b±0.4  | 12.7c±0.6 | 1.1d±0.1 | ND       | ND       | 4.3e±0.2   |
| 38 | Muller Thurgau                      | ND       | 2.7a±0.1  | ND        | ND       | ND       | ND       | 11.9b±0.6  |
| 39 | Muller Thurgau                      | ND       | 2.1a±0.1  | ND        | ND       | ND       | ND       | 6.0b±0.3   |
| 40 | Muller Thurgau                      | ND       | 3.0a±0.2  | ND        | ND       | ND       | ND       | 7.4b±0.4   |
| 41 | Muscat Ottonel                      | 2.8a±0.2 | 1.7b±0.1  | 23.2c±1.0 | ND       | 2.3d±0.1 | ND       | 6.2e±0.3   |
| 42 | Neuburger                           | ND       | ND        | ND        | ND       | ND       | 1.0a±0.1 | 3.9b±0.2   |
| 43 | Neuburger                           | ND       | 1.7a±0.1  | ND        | ND       | ND       | ND       | ND         |
| 44 | Neuburger                           | ND       | 6.2a±0.3  | ND        | ND       | 2.9b±0.1 | ND       | 6.8a±0.4   |
| 45 | Neuburger                           | ND       | 2.2a±0.1  | ND        | 3.1b±0.2 | 3.1b±0.2 | ND       | 6.1c±0.3   |
| 46 | Neuburger                           | ND       | 1.8a±0.1  | ND        | ND       | ND       | ND       | 5.7b±0.3   |
| 47 | Pálava                              | ND       | 5.2a±0.3  | 10.2b±0.4 | 1.7c±0.1 | ND       | ND       | 5.3a ± 0.2 |
| 48 | Pálava                              | ND       | 4.7a±0.2  | ND        | ND       | 2.5b±0.1 | ND       | ND         |
| 49 | Pálava                              | ND       | 4.3a ±0.2 | ND        | ND       | ND       | ND       | 8.2b ± 0.4 |
| 50 | Pinot Blanc                         | ND       | ND        | ND        | ND       | ND       | ND       | 6.2a±0.3   |
| 51 | Pinot Blanc                         | ND       | 34.6a±1.8 | ND        | ND       | ND       | ND       | ND         |
| 52 | Pinot Blanc                         | ND       | 3.2a±0.1  | 2.7b±0.1  | 0.8c±0.1 | 1.2d±0.1 | ND       | 4.7e±0.2   |
| 53 | Pinot Blanc                         | ND       | 2.4a±0.1  | 1.6b±0.1  | 0.8c±0.1 | 0.3d±0.1 | ND       | 4.1e±0.2   |

|    |                  |          |           |           |          |          |          |           |
|----|------------------|----------|-----------|-----------|----------|----------|----------|-----------|
| 54 | Pinot Blanc      | ND       | 1.3a±0.1  | 1.3a±0.1  | 0.6b±0.1 | 0.1c±0.1 | ND       | 1.7d±0.1  |
| 55 | Pinot Blanc      | ND       | 1.2a±0.1  | 5.1b±0.2  | ND       | 3.7c±0.1 | ND       | 4.9b±0.2  |
| 56 | Pinot Blanc      | ND       | 0.2a±0.1  | ND        | ND       | ND       | ND       | 3.3b±0.1  |
| 57 | Pinot Blanc      | ND       | 0.2a±0.1  | ND        | ND       | ND       | ND       | 3.4b±0.1  |
| 58 | Pinot Gris       | 2.7a±0.2 | 8.3b±0.3  | 9.1b±0.5  | ND       | ND       | ND       | 4.1c±0.2  |
| 59 | Pinot Gris       | ND       | 3.6a±0.2  | 4.4b±0.2  | 1.9c±0.1 | ND       | 1.4d±0.1 | 7.9e±0.4  |
| 60 | Pinot Gris       | 2.3a±0.1 | 7.3b±0.3  | 16.2c±0.9 | ND       | ND       | ND       | 5.0d±0.3  |
| 61 | Pinot Gris       | ND       | 3.5a±0.2  | ND        | ND       | ND       | ND       | 7.2b±0.3  |
| 62 | Pinot Gris       | ND       | 1.4a±0.1  | ND        | ND       | ND       | ND       | 6.2b±0.3  |
| 63 | Pinot Gris       | ND       | ND        | 3.8a±0.2  | 0.4b±0.0 | ND       | 1.7c±0.1 | 3.6a±0.1  |
| 64 | Pinot Gris       | ND       | 2.8a±0.1  | ND        | ND       | 1.2b±0.1 | ND       | 2.8a±0.1  |
| 65 | Pinot Gris       | ND       | 1.6a±0.1  | 1.9b±0.1  | ND       | 0.3c±0.1 | ND       | 4.5d±0.2  |
| 66 | Pinot Gris       | ND       | 1.4a±0.1  | 0.7b±0.1  | 0.8b±0.1 | 0.7b±0.1 | ND       | 1.5a±0.1  |
| 67 | Pinot Gris       | ND       | 15.8a±0.7 | 1.9b±0.1  | 0.4c±0.1 | 0.7d±0.1 | ND       | 5.8e±0.3  |
| 68 | Pinot Gris       | ND       | 1.2a±0.1  | 1.4a±0.1  | 0.4b±0.1 | ND       | ND       | 1.8c±0.1  |
| 69 | Pinot Gris       | ND       | 2.6a±0.1  | 2.0b±0.1  | ND       | ND       | ND       | 2.7a±0.1  |
| 70 | Pinot Gris       | ND       | 0.1a±0.1  | ND        | ND       | ND       | ND       | 1.7b±0.1  |
| 71 | Pinot Gris       | ND       | 0.1a±0.1  | ND        | ND       | ND       | ND       | 2.1b±0.1  |
| 72 | Pinot Gris       | ND       | 0.1a±0.1  | ND        | ND       | ND       | ND       | 3.4b±0.1  |
| 73 | Pinot Gris       | ND       | 1.2a±0.1  | ND        | ND       | ND       | ND       | 5.3b±0.2  |
| 74 | Pinot Gris       | ND       | 0.7a±0.1  | ND        | ND       | ND       | ND       | 2.5b±0.1  |
| 75 | Pinot Gris       | ND       | 1.5a±0.1  | ND        | ND       | 4.4b±0.2 | ND       | 3.7c±0.1  |
| 76 | Pinot Gris       | ND       | 2.2a±0.1  | ND        | ND       | 5.9b±0.3 | ND       | 6.4b±0.2  |
| 77 | Riesling Italico | ND       | 1.4a±0.1  | 4.7b±0.3  | ND       | ND       | 1.7c±0.1 | 4.9a±0.3  |
| 78 | Riesling Italico | 0.9a±0.1 | 3.0b±0.1  | 6.3c±0.4  | 1.1a±0.1 | ND       | ND       | 4.2d±0.2  |
| 79 | Riesling Italico | ND       | 3.8a±0.2  | ND        | ND       | ND       | ND       | 10.3b±0.5 |
| 80 | Riesling Italico | ND       | 4.3a±0.2  | ND        | ND       | ND       | ND       | 10.1b±0.5 |
| 81 | Riesling Italico | ND       | 1.5a±0.1  | 2.5b±0.1  | ND       | ND       | ND       | 4.9c±0.3  |
| 82 | Riesling Italico | ND       | 3.3a±0.2  | ND        | ND       | ND       | ND       | 4.7b±0.3  |
| 83 | Riesling Italico | ND       | 3.4a±0.1  | 4.4b±0.2  | ND       | ND       | ND       | 2.2c±0.1  |
| 84 | Riesling Italico | ND       | 1.0a±0.1  | 1.9b±0.1  | 0.5c±0.1 | ND       | ND       | 1.9b±0.1  |
| 85 | Riesling Italico | ND       | 3.1a±0.1  | 1.1b±0.1  | 1.3c±0.1 | ND       | ND       | 3.5d±0.1  |

|     |                  |          |           |           |          |          |          |           |
|-----|------------------|----------|-----------|-----------|----------|----------|----------|-----------|
| 86  | Riesling Italico | ND       | 0.2a±0.1  | ND        | ND       | 1.8b±0.1 | ND       | 1.6b±0.1  |
| 87  | Riesling Italico | 1.8a±0.1 | 0.9b±0.1  | ND        | ND       | 1.7a±0.1 | ND       | 2.3c±0.1  |
| 88  | Riesling Italico | ND       | 2.4a±0.1  | ND        | ND       | 6.4b±0.3 | ND       | 4.9c±0.2  |
| 89  | Riesling Weisser | ND       | 4.8a±0.2  | ND        | ND       | ND       | ND       | 3.9b±0.2  |
| 90  | Riesling Weisser | ND       | 2.5a±0.1  | ND        | ND       | ND       | ND       | 8.6b±0.4  |
| 91  | Riesling Weisser | ND       | 1.9a±0.1  | ND        | ND       | ND       | ND       | 5.3b±0.3  |
| 92  | Riesling Weisser | ND       | 3.6a±0.2  | ND        | ND       | ND       | ND       | 6.6b±0.4  |
| 93  | Riesling Weisser | 1.7a±0.1 | 9.6b±0.5  | 9.7b±0.5  | 1.1c±0.1 | ND       | ND       | 6.1d±0.3  |
| 94  | Riesling Weisser | ND       | 12.7a±0.6 | ND        | ND       | ND       | ND       | 10.8b±0.5 |
| 95  | Riesling Weisser | ND       | 2.2a±0.1  | ND        | ND       | ND       | ND       | 8.1b±0.4  |
| 96  | Riesling Weisser | ND       | 3.1a±0.1  | ND        | ND       | ND       | ND       | 7.7b±0.4  |
| 97  | Riesling Weisser | ND       | 7.6a±0.3  | 1.6b±0.1  | 1.5b±0.1 | 0.5c±0.1 | ND       | 4.3d±0.2  |
| 98  | Riesling Weisser | ND       | 5.4a±0.2  | 2.5b±0.1  | ND       | ND       | ND       | 4.2c±0.2  |
| 99  | Riesling Weisser | ND       | 4.1a±0.2  | 1.1b±0.1  | 0.5c±0.1 | 0.6c±0.1 | ND       | 1.8d±0.1  |
| 100 | Riesling Weisser | ND       | 2.7a±0.1  | 0.6b±0.1  | 0.7b±0.1 | ND       | ND       | 2.2c±0.1  |
| 101 | Riesling Weisser | ND       | 1.8a±0.1  | 3.6b±0.1  | 0.5c±0.1 | 0.5c±0.1 | ND       | 3.6b±0.2  |
| 102 | Riesling Weisser | ND       | 3.5a±0.2  | 1.6b±0.1  | ND       | 0.6c±0.1 | ND       | 1.7b±0.1  |
| 103 | Riesling Weisser | ND       | 2.6a±0.1  | ND        | ND       | ND       | ND       | 2.4a±0.1  |
| 104 | Riesling Weisser | ND       | 1.3a±0.1  | 3.5b±0.1  | ND       | ND       | ND       | 5.9c±0.2  |
| 105 | Riesling Weisser | ND       | ND        | ND        | ND       | ND       | ND       | ND        |
| 106 | Riesling Weisser | ND       | 0.2a±0.1  | ND        | ND       | ND       | ND       | 4.4b±0.2  |
| 107 | Riesling Weisser | ND       | 0.3a0.1   | ND        | ND       | ND       | ND       | 5.8b±0.3  |
| 108 | Riesling Weisser | ND       | 0.2a±0.1  | ND        | ND       | ND       | ND       | 1.7b±0.1  |
| 109 | Riesling Weisser | ND       | 0.5a±0.1  | ND        | ND       | 2.8b±0.1 | ND       | 2.9b±0.1  |
| 110 | Riesling Weisser | ND       | 0.4a±0.1  | ND        | ND       | ND       | ND       | 5.9b±0.3  |
| 111 | Sauvignon Blanc  | 4.5a±0.2 | 11.0b±0.5 | 11.3b±0.6 | ND       | 1.5c±0.1 | ND       | 6.6d±0.3  |
| 112 | Sauvignon Blanc  | ND       | ND        | ND        | ND       | ND       | ND       | 2.0a±0.1  |
| 113 | Sauvignon Blanc  | ND       | ND        | 2.8a±0.2  | ND       | ND       | 1.0b±0.1 | 2.5a±0.1  |
| 114 | Sauvignon Blanc  | ND       | 2.7a±0.1  | ND        | ND       | ND       | ND       | ND        |
| 115 | Sauvignon Blanc  | ND       | 1.2a±0.1  | ND        | 1.1a±0.1 | ND       | ND       | 4.3b±0.2  |
| 116 | Sauvignon Blanc  | ND       | 2.6a±0.1  | ND        | ND       | ND       | ND       | 5.4b±0.2  |
| 117 | Sauvignon Blanc  | ND       | ND        | 2.1a±0.1  | 0.9b±0.1 | ND       | 3.4c±0.1 | 2.5d±0.1  |

|     |                 |    |           |           |          |          |          |           |
|-----|-----------------|----|-----------|-----------|----------|----------|----------|-----------|
| 118 | Sauvignon Blanc | ND | 2.5a±0.1  | 2.0b±0.1  | ND       | ND       | ND       | 4.8c±0.2  |
| 119 | Sauvignon Blanc | ND | 6.6a±0.3  | 3.7b±0.1  | 0.8c±0.1 | 0.6c±0.1 | ND       | 5.4d±0.2  |
| 120 | Sauvignon Blanc | ND | 1.8a±0.1  | 1.6a±0.1  | ND       | 0.5b±0.1 | ND       | 3.4c±0.2  |
| 121 | Sauvignon Blanc | ND | 2.6a±0.1  | 2.6a±0.1  | 0.5b±0.1 | 1.0c±0.1 | ND       | 5.3d±0.2  |
| 122 | Sauvignon Blanc | ND | 6.9a±0.3  | 1.5b±0.1  | 0.4c±0.1 | 0.2c±0.1 | ND       | 1.7b±0.1  |
| 123 | Sauvignon Blanc | ND | 2.4a±0.1  | ND        | ND       | ND       | ND       | 4.7b±0.2  |
| 124 | Sauvignon Blanc | ND | 2.8a±0.1  | 1.7b±0.1  | ND       | ND       | ND       | 3.3c±0.1  |
| 125 | Sauvignon Blanc | ND | 8.8a±0.4  | 1.7b±0.1  | ND       | 1.4c±0.1 | ND       | 2.4d±0.1  |
| 126 | Sauvignon Blanc | ND | 0.9a±0.1  | ND        | ND       | ND       | ND       | 2.8b±0.1  |
| 127 | Sauvignon Blanc | ND | 0.6a±0.1  | ND        | ND       | ND       | ND       | 3.2b±0.1  |
| 128 | Sauvignon Blanc | ND | 0.2a±0.1  | ND        | ND       | 0.8b±0.1 | ND       | 1.1c±0.1  |
| 129 | Sauvignon Blanc | ND | 0.1a±0.1  | ND        | ND       | ND       | ND       | 1.2b±0.1  |
| 130 | Sauvignon Blanc | ND | 0.3a±0.1  | ND        | ND       | ND       | ND       | 3.8b±0.2  |
| 131 | Sauvignon Blanc | ND | 0.1a±0.1  | ND        | ND       | ND       | ND       | 1.3b±0.1  |
| 132 | Sauvignon Blanc | ND | 0.1a±0.1  | ND        | ND       | ND       | ND       | 2.3b±0.1  |
| 133 | Sauvignon Blanc | ND | 0.4a±0.1  | ND        | ND       | ND       | ND       | 1.9b±0.1  |
| 134 | Sauvignon Blanc | ND | 0.1a±0.1  | ND        | ND       | ND       | ND       | 2.2b±0.1  |
| 135 | Sauvignon Blanc | ND | 0.6a±0.1  | ND        | ND       | 6.3b±0.2 | ND       | 6.9c±0.3  |
| 136 | Sauvignon Blanc | ND | 0.6a±0.1  | ND        | ND       | ND       | ND       | 5.9b±0.3  |
| 137 | Solaris         | ND | ND        | ND        | ND       | ND       | ND       | 4.1±0.2   |
| 138 | Sylvaner        | ND | 3.7a±0.2  | ND        | ND       | ND       | 1.1b±0.0 | 3.2c±0.1  |
| 139 | Sylvaner        | ND | 3.2a±0.2  | ND        | ND       | ND       | ND       | 6.7b±0.3  |
| 140 | Tramini         | ND | 2.8a±0.1  | 5.6b±0.3  | ND       | ND       | ND       | 4.3c±0.3  |
| 141 | Tramini         | ND | 9.2a±0.4  | 5.1b±0.2  | ND       | 1.5c±0.1 | ND       | 7.9d±0.4  |
| 142 | Tramini         | ND | 10.0a±0.5 | 9.4a±0.5  | ND       | 3.9b±0.2 | ND       | 9.2a±0.5  |
| 143 | Tramini         | ND | 3.8a±0.2  | ND        | ND       | ND       | ND       | 11.9b±0.6 |
| 144 | Tramini         | ND | 1.6a±0.1  | 3.6b±0.16 | 0.7c±0.1 | ND       | ND       | 2.7d±0.1  |
| 145 | Tramini         | ND | 0.6a±0.1  | 2.2b±0.11 | 0.6a±0.1 | ND       | ND       | 2.2b±0.1  |
| 146 | Tramini         | ND | 3.1a±0.1  | ND        | ND       | ND       | ND       | 1.9b±0.1  |
| 147 | Tramini         | ND | 0.6a±0.1  | 4.8b±0.25 | ND       | ND       | ND       | 2.1c±0.1  |
| 148 | Tramini         | ND | 2.0a±0.1  | 3.8b±0.20 | ND       | 1.0c±0.1 | ND       | 2.9d±0.1  |
| 149 | Tramini         | ND | 0.5a±0.1  | 2.2b±0.14 | ND       | ND       | ND       | 4.2c±0.2  |

|     |                 |    |           |          |          |          |          |           |
|-----|-----------------|----|-----------|----------|----------|----------|----------|-----------|
| 150 | Tramini         | ND | 0.2a±0.1  | ND       | ND       | ND       | ND       | 2.6±0.1   |
| 151 | Tramini         | ND | 0.8a±0.1  | ND       | ND       | ND       | ND       | 1.4±0.1   |
| 152 | Tramini         | ND | 0.6a±0.1  | ND       | ND       | 2.1b±0.1 | ND       | 3.7c±0.2  |
| 153 | Tramini         | ND | 0.4a±0.1  | ND       | ND       | ND       | ND       | 7.3b±0.3  |
| 154 | Veltliner Green | ND | 1.7a±0.1  | 4.1b±0.2 | ND       | ND       | ND       | 5.8c±0.3  |
| 155 | Veltliner Green | ND | ND        | ND       | ND       | ND       | 1.3a±0.1 | 3.4b±0.2  |
| 156 | Veltliner Green | ND | 3.4a±0.2  | 5.8b±0.3 | ND       | ND       | ND       | 5.7b±0.2  |
| 157 | Veltliner Green | ND | 2.5a±0.1  | ND       | ND       | ND       | ND       | 7.9b±0.5  |
| 158 | Veltliner Green | ND | 1.8a±0.1  | ND       | ND       | ND       | ND       | 5.5b±0.3  |
| 159 | Veltliner Green | ND | 6.7a±0.3  | 9.2b±0.5 | ND       | ND       | ND       | 10.0c±0.5 |
| 160 | Veltliner Green | ND | 4.2a±0.2  | ND       | 1.5b±0.1 | ND       | ND       | 11.2c±0.7 |
| 161 | Veltliner Green | ND | ND        | ND       | ND       | ND       | 0.7a±0.0 | 2.0b±0.1  |
| 162 | Veltliner Green | ND | 1.5a±0.1  | 2.2b±0.1 | 0.3c±0.1 | 1.0d±0.1 | 0.4c±0.1 | 3.0e±0.1  |
| 163 | Veltliner Green | ND | 5.4a±0.2  | 2.4b±0.1 | ND       | ND       | ND       | 5.9c±0.2  |
| 164 | Veltliner Green | ND | 1.6a±0.1  | 1.3b±0.1 | ND       | 0.6c±0.1 | ND       | 1.1b±0.1  |
| 165 | Veltliner Green | ND | 1.4a±0.1  | 1.7b±0.1 | 0.4c±0.1 | ND       | ND       | 4.4d±0.2  |
| 166 | Veltliner Green | ND | 0.9a±0.1  | 0.9a±0.1 | 0.7a±0.1 | 1.2b±0.1 | ND       | 1.9c±0.1  |
| 167 | Veltliner Green | ND | 0.5a±0.1  | 4.1b±0.1 | ND       | ND       | ND       | 1.9c±0.1  |
| 168 | Veltliner Green | ND | 1.4a±0.1  | 1.4a±0.1 | ND       | ND       | ND       | 4.8b±0.2  |
| 169 | Veltliner Green | ND | 12.3a±0.6 | 1.3b±0.1 | ND       | 0.6c±0.1 | ND       | 2.6d±0.1  |
| 170 | Veltliner Green | ND | 10.5a±0.5 | 1.7b±0.1 | 0.4c±0.1 | 0.8d±0.1 | ND       | 2.4e±0.1  |
| 171 | Veltliner Green | ND | 0.6a±0.1  | ND       | ND       | ND       | ND       | 2.6b±0.1  |
| 172 | Veltliner Green | ND | 0.5a±0.1  | 3.2b±0.1 | ND       | 2.5c±0.1 | ND       | 6.6d±0.3  |
| 173 | Veltliner Green | ND | 0.1a±0.1  | ND       | ND       | ND       | ND       | 1.0b±0.1  |
| 174 | Veltliner Green | ND | ND        | ND       | ND       | ND       | ND       | ND        |
| 175 | Veltliner Green | ND | ND        | ND       | ND       | ND       | ND       | ND        |
| 176 | Veltliner Green | ND | 0.1a±0.1  | ND       | ND       | ND       | ND       | 2.0b±0.1  |
| 177 | Veltliner Green | ND | 0.6a±0.1  | ND       | ND       | ND       | ND       | 1.1b±0.1  |
| 178 | Veltliner Green | ND | 1.5a±0.1  | ND       | ND       | 1.4a±0.1 | ND       | 6.3b±0.3  |
| 179 | Veltliner Green | ND | 0.7a±0.1  | ND       | ND       | 3.0b±0.1 | ND       | 5.9c±0.2  |
| 180 | Veltliner Green | ND | 0.4a±0.1  | ND       | ND       | 3.7b±0.1 | ND       | 3.1c±0.1  |

\* ND – not detected

\*\* HIS: histamine; TYR: tyramine; PUT: putrescine; CAD: cadaverine; PHE: phenylethylamine; SPD: spermidine; SPM: spermine

<sup>a</sup> The values are expressed as mean  $\pm$  standard deviation. The mean values within a line (the difference between individual BA) followed by different letters differ ( $p < 0.05$ ).

**Table S2.** Biogenic amines content (mg/L)<sup>a</sup> in rosé wines from the Central European region.

| Number | Wine                    | Biogenic amines content** |                |                |                |                |     |                 |
|--------|-------------------------|---------------------------|----------------|----------------|----------------|----------------|-----|-----------------|
|        |                         | HIS                       | TYM            | PUT            | CAD            | PEA            | SPD | SPN             |
| 1      | André                   | ND*                       | 5.5a $\pm$ 0.3 | ND             | ND             | ND             | ND  | 10.5b $\pm$ 0.5 |
| 2      | Blaifränkisch           | ND                        | 8.5a $\pm$ 0.4 | 5.5b $\pm$ 0.3 | ND             | ND             | ND  | 6.3c $\pm$ 0.3  |
| 3      | Blaifränkisch           | ND                        | 3.9a $\pm$ 0.1 | ND             | ND             | ND             | ND  | 8.9b $\pm$ 0.5  |
| 4      | Blaifränkisch           | ND                        | ND             | ND             | 0.6a $\pm$ 0.1 | ND             | ND  | ND              |
| 5      | Blaifränkisch           | ND                        | 3.6a $\pm$ 0.2 | ND             | 0.7b $\pm$ 0.1 | 1.1c $\pm$ 0.0 | ND  | 6.1d $\pm$ 0.3  |
| 6      | Blaifränkisch           | ND                        | 5.3a $\pm$ 0.2 | ND             | ND             | ND             | ND  | 5.8b $\pm$ 0.3  |
| 7      | Blaifränkisch           | ND                        | 1.5a $\pm$ 0.1 | ND             | ND             | ND             | ND  | 5.6b $\pm$ 0.3  |
| 8      | Cabernet Sauvignon      | ND                        | ND             | ND             | 0.7a $\pm$ 0.1 | ND             | ND  | ND              |
| 9      | Merlot                  | ND                        | 3.1a $\pm$ 0.2 | ND             | ND             | 2.2b $\pm$ 0.1 | ND  | 6.8c $\pm$ 0.3  |
| 10     | André and Blaifränkisch | 2.9a $\pm$ 0.2            | 3.1a $\pm$ 0.2 | ND             | ND             | ND             | ND  | 6.7b $\pm$ 0.3  |
| 11     | Pinot noir              | ND                        | ND             | ND             | ND             | ND             | ND  | 3.9a $\pm$ 0.2  |
| 12     | Portugieser. Blauer     | ND                        | 1.1a $\pm$ 0.1 | ND             | ND             | ND             | ND  | 3.8b $\pm$ 0.2  |
| 13     | Portugieser. Blauer     | 1.8a $\pm$ 0.1            | 3.4b $\pm$ 0.2 | ND             | ND             | ND             | ND  | 2.5c $\pm$ 0.1  |
| 14     | Saint Laurent           | ND                        | 0.9a $\pm$ 0.1 | ND             | ND             | ND             | ND  | 6.2b $\pm$ 0.3  |
| 15     | Zweigelt                | ND                        | ND             | ND             | ND             | ND             | ND  | 4.4a $\pm$ 0.2  |
| 16     | Zweigelt                | ND                        | 2.0a $\pm$ 0.1 | ND             | ND             | ND             | ND  | 4.9b $\pm$ 0.3  |
| 17     | Zweigelt                | ND                        | 9.3a $\pm$ 0.4 | ND             | ND             | ND             | ND  | 7.8b $\pm$ 0.4  |

\* ND – not detected

\*\* HIS: histamine; TYR: tyramine; PUT: putrescine; CAD: cadaverine; PHE: phenylethylamine; SPD: spermidine; SPM: spermine

<sup>a</sup> The values are expressed as mean  $\pm$  standard deviation. The mean values within a line (the difference between individual BA) followed by different letters differ ( $p < 0.05$ ).

**Table S3.** Biogenic amines content (mg/L)<sup>a</sup> in red wines from Central European region.

| Number | Wine                                                               | Biogenic amines content** |                        |                          |                       |                        |                       |                        |
|--------|--------------------------------------------------------------------|---------------------------|------------------------|--------------------------|-----------------------|------------------------|-----------------------|------------------------|
|        |                                                                    | HIS                       | TYM                    | PUT                      | CAD                   | PEA                    | SPD                   | SPN                    |
| 1      | Alibernet                                                          | 1.2 <sup>a</sup> ±0.1     | 3.9 <sup>b</sup> ±0.2  | 5.9 <sup>c</sup> ±0.3    | ND*                   | ND                     | ND                    | 3.9 <sup>b</sup> ±0.2  |
| 2      | André                                                              | ND                        | 1.7 <sup>a</sup> ±0.1  | 6.0 <sup>b</sup> ±0.3    | ND                    | ND                     | ND                    | 3.9 <sup>c</sup> ±0.2  |
| 3      | André                                                              | ND                        | 4.8 <sup>a</sup> ±0.2  | ND                       | 0.7 <sup>b</sup> ±0.1 | 1.4 <sup>c</sup> ±0.1  | 1.3 <sup>c</sup> ±0.1 | 5.6 <sup>d</sup> ±0.3  |
| 4      | André                                                              | ND                        | 1.8 <sup>a</sup> ±0.2  | ND                       | ND                    | ND                     | ND                    | 6.6 <sup>b</sup> ±0.3  |
| 5      | André                                                              | ND                        | 5.3 <sup>a</sup> ±0.3  | ND                       | ND                    | ND                     | ND                    | 11.0 <sup>b</sup> ±0.5 |
| 6      | Blaufränkisch                                                      | ND                        | 3.9 <sup>a</sup> ±0.2  | 13.0 <sup>b</sup> ±0.7   | 1.5 <sup>c</sup> ±0.1 | 1.5 <sup>c</sup> ±0.1  | 1.1 <sup>d</sup> ±0.1 | 8.3 <sup>e</sup> ±0.4  |
| 7      | Blaufränkisch                                                      | 1.4 <sup>a</sup> ±0.1     | 5.1 <sup>b</sup> ±0.2  | 14.3 <sup>c</sup> ±0.7   | 0.8 <sup>d</sup> ±0.1 | 1.9 <sup>e</sup> ±0.1  | 0.6 <sup>d</sup> ±0.1 | 3.2 <sup>f</sup> ±0.1  |
| 8      | Blaufränkisch                                                      | ND                        | ND                     | ND                       | ND                    | ND                     | 1.2 <sup>a</sup> ±0.1 | 5.6 <sup>b</sup> ±0.3  |
| 9      | Blaufränkisch                                                      | 3.5 <sup>a</sup> ±0.2     | 11.0 <sup>b</sup> ±0.6 | 17.1 <sup>c</sup> ±1.0   | ND                    | ND                     | ND                    | 6.1 <sup>d</sup> ±0.3  |
| 10     | Blaufränkisch                                                      | 3.0 <sup>a</sup> ±0.1     | 1.7 <sup>b</sup> ±0.1  | 39.2 <sup>c</sup> ±2.1   | ND                    | ND                     | ND                    | 3.0 <sup>e</sup> ±0.1  |
| 11     | Cabernet Sauvignon                                                 | ND                        | 4.5 <sup>a</sup> ±0.2  | 6.7 <sup>b</sup> ±0.3    | ND                    | ND                     | ND                    | 9.2 <sup>c</sup> ±0.4  |
| 12     | Cabernet Sauvignon                                                 | 9.6 <sup>a</sup> ±0.4     | 2.9 <sup>b</sup> ±0.2  | 6.5 <sup>c</sup> ±0.3    | ND                    | 2.3 <sup>d</sup> ±0.1  | 0.7 <sup>e</sup> ±0.1 | 3.1 <sup>b</sup> ±0.2  |
| 13     | Cabernet Sauvignon                                                 | ND                        | ND                     | ND                       | ND                    | ND                     | ND                    | ND                     |
| 14     | Dornfelder                                                         | ND                        | 4.9 <sup>a</sup> ±0.2  | ND                       | ND                    | ND                     | ND                    | 5.5 <sup>b</sup> ±0.3  |
| 15     | Dornfelder                                                         | ND                        | 4.0 <sup>a</sup> ±0.2  | 8.9 <sup>b</sup> ±0.4    | 3.9 <sup>a</sup> ±0.2 | ND                     | 3.9 <sup>a</sup> ±0.2 | 9.1 <sup>b</sup> ±0.4  |
| 16     | Merlot                                                             | ND                        | 6.1 <sup>a</sup> ±0.3  | 11.1 <sup>b</sup> ±0.6   | ND                    | ND                     | ND                    | ND                     |
| 17     | Merlot                                                             | 19.4 <sup>a</sup> ±1.0    | ND                     | 272.0 <sup>b</sup> ±12.8 | ND                    | 17.8 <sup>c</sup> ±1.1 | 5.7 <sup>d</sup> ±0.3 | ND                     |
| 18     | Merlot                                                             | 2.7 <sup>a</sup> ±0.1     | 5.2 <sup>b</sup> ±0.2  | 13.9 <sup>c</sup> ±0.6   | ND                    | ND                     | ND                    | 6.8 <sup>d</sup> ±0.4  |
| 19     | Mixture of Alibernet and Rubinet                                   | 11.5 <sup>a</sup> ±0.6    | 8.5 <sup>b</sup> ±0.5  | 21.4 <sup>c</sup> ±1.1   | ND                    | ND                     | ND                    | 3.0 <sup>d</sup> ±0.2  |
|        | Mixture of Blaufränkisch and Saint Laurent and Portugieser. Blauer | 5.6 <sup>a</sup> ±0.3     | 9.0 <sup>b</sup> ±0.5  | 26.6 <sup>c</sup> ±1.2   | ND                    | ND                     | ND                    | ND                     |
| 20     | Mixture of Cabernet Moravia and Alibernet                          | 3.0 <sup>a</sup> ±0.2     | 6.2 <sup>b</sup> ±0.3  | 12.0 <sup>c</sup> ±0.6   | ND                    | 1.5 <sup>d</sup> ±0.1  | ND                    | 5.5 <sup>e</sup> ±0.3  |
| 21     | Pinot noir                                                         | ND                        | 18.1 <sup>a</sup> ±0.9 | 6.6 <sup>b</sup> ±0.3    | ND                    | ND                     | 1.3 <sup>c</sup> ±0.1 | 6.6 <sup>b</sup> ±0.3  |
| 22     | Pinot noir                                                         | ND                        | 1.3 <sup>a</sup> ±0.1  | ND                       | ND                    | ND                     | ND                    | 5.6 <sup>b</sup> ±0.3  |
| 23     | Portugieser. Blauer                                                | ND                        | 4.9 <sup>a</sup> ±0.2  | 7.3 <sup>b</sup> ±0.4    | 1.4 <sup>c</sup> ±0.1 | ND                     | 1.6 <sup>c</sup> ±0.1 | 8.1 <sup>d</sup> ±0.4  |

|    |                     |                        |                        |                        |                       |    |                       |                        |
|----|---------------------|------------------------|------------------------|------------------------|-----------------------|----|-----------------------|------------------------|
| 25 | Portugieser. Blauer | ND                     | ND                     | ND                     | ND                    | ND | ND                    | 4.8 <sup>a</sup> ±0.3  |
| 26 | Portugieser. Blauer | ND                     | 1.5 <sup>a</sup> ±0.1  | 5.1 <sup>b</sup> ±0.2  | 1.2 <sup>c</sup> ±0.1 | ND | ND                    | 4.7 <sup>b</sup> ±0.2  |
| 27 | Portugieser. Blauer | ND                     | ND                     | 17.6 <sup>a</sup> ±0.9 | ND                    | ND | ND                    | 6.3 <sup>b</sup> ±0.3  |
| 28 | Portugieser. Blauer | ND                     | 3.9 <sup>a</sup> ±0.2  | ND                     | ND                    | ND | ND                    | 10.7 <sup>b</sup> ±0.5 |
| 29 | Portugieser. Blauer | 15.3 <sup>a</sup> ±0.8 | 16.2 <sup>a</sup> ±0.8 | 74.0 <sup>b</sup> ±3.8 | ND                    | ND | ND                    | ND                     |
| 30 | Saint Laurent       | ND                     | 3.7 <sup>a</sup> ±0.2  | 7.1 <sup>b</sup> ±0.4  | ND                    | ND | ND                    | 6.8 <sup>b</sup> ±0.3  |
| 31 | Saint Laurent       | ND                     | ND                     | ND                     | ND                    | ND | ND                    | 3.9 <sup>a</sup> ±0.2  |
| 32 | Saint Laurent       | 1.8 <sup>a</sup> ±0.1  | 2.0 <sup>a</sup> ±0.1  | 8.4 <sup>b</sup> ±0.4  | ND                    | ND | 6.8 <sup>c</sup> ±0.3 | 3.5 <sup>d</sup> ±0.2  |
| 33 | Saint Laurent       | 2.3 <sup>a</sup> ±0.1  | 25.9 <sup>b</sup> ±1.3 | 8.0 <sup>c</sup> ±0.4  | ND                    | ND | ND                    | 5.7 <sup>d</sup> ±0.3  |
| 34 | Saint Laurent       | ND                     | ND                     | ND                     | ND                    | ND | ND                    | 6.7 <sup>a</sup> ±0.3  |
| 35 | Zweigelt            | ND                     | 1.8 <sup>a</sup> ±0.1  | 5.1 <sup>b</sup> ±0.2  | ND                    | ND | ND                    | 6.4 <sup>c</sup> ±0.4  |

\* ND – not detected

\*\* HIS: histamine; TYR: tyramine; PUT: putrescine; CAD: cadaverine; PHE: phenylethylamine; SPD: spermidine; SPM: spermine

<sup>a</sup> The values are expressed as mean ± standard deviation. The mean values within a line (the difference between individual BA) followed by different letters differ (p < 0.05).
